# Supplementary material for: Sequential displacement of Type VI Secretion System effector genes leads to evolution of diverse immunity gene arrays in Vibrio cholerae
Source: PubMed Central journal article supplement (PMC5361080; doi:10.1038/srep45133), 2017-03-22
Supplement: srep45133-s1.pdf [file srep45133-s1.pdf]

## Supplementary information

### Sequential displacement of Type VI Secretion System effector genes leads to evolution of diverse immunity gene arrays in *Vibrio cholerae*

Paul C. Kirchberger<sup>1</sup>, Daniel Unterweger<sup>2</sup>, Daniele Provenzano<sup>3</sup>, Stefan Pukatzki<sup>4</sup> and Yan Boucher<sup>1#</sup>

<sup>1</sup>Department of Biological Sciences, University of Alberta, Alberta, Canada

<sup>2</sup> Department of Zoology, University of Oxford, Oxford, United Kingdom

<sup>3</sup> Department of Biological Sciences, University of Texas Rio Grande Valley, Texas, United States

<sup>4</sup> Department of Immunology & Microbiology, University of Colorado School of Medicine, Colorado, United States

**#Corresponding author:** Yan Boucher, Department of Biological Sciences,

University of Alberta, Edmonton, AB T6G 2E9, Canada; yboucher@ualberta.ca

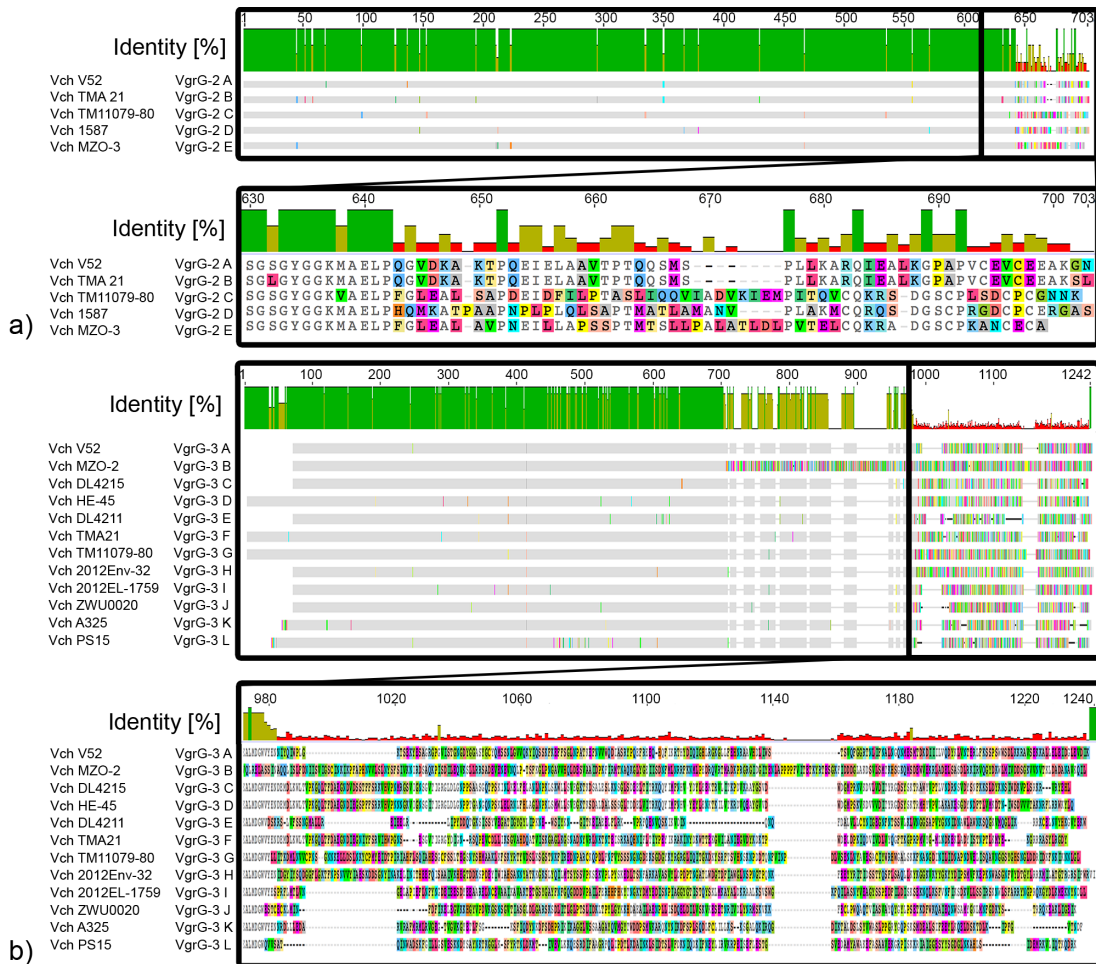

**Figure S1: Amino acid alignment of VgrG-2 and VgrG-3.** a) Alignment of VgrG-2 proteins found in aux-2 cluster encoding different types of cargo effectors b) Alignment of VgrG-3 proteins in large cluster encoding different variable C-terminal regions. Conserved sites are depicted as grey, while colour indicates amino acid change compared to the consensus. Variable C-terminal regions of VgrG-2 and VgrG-3 are enlarged. Vch = *Vibrio cholerae*.

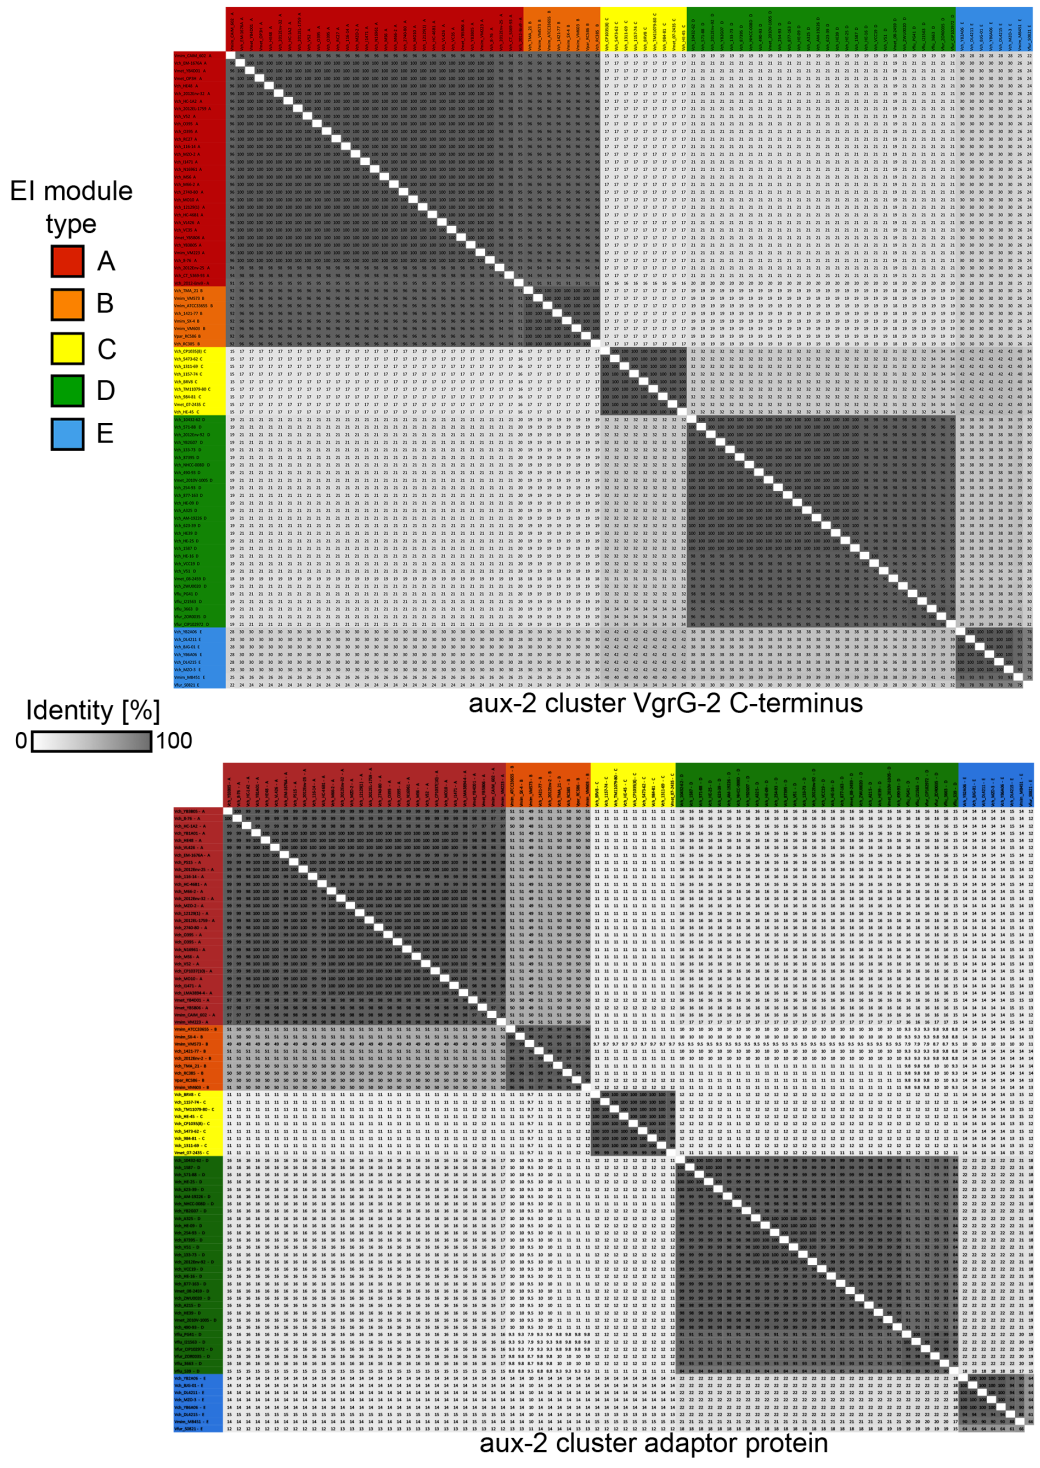

**Figure S2: Amino acid identity of variable region of VgrG-2 and aux-2 adaptor proteins.** Heat maps indicate percent identity of aligned protein sequences found in investigated strains. Colouring of strain names indicates type of EI module present

in the aux-2 cluster of the respective strain. Pseudogenes with interrupted reading frames were not included in the comparison. Vch = *Vibrio cholerae*, Vmet = *V. metoecus*, Vmim = *V. mimicus*, Vfur = *V. furnissii*, Vflu = *V. fluvialis*, Vpar = *V. sp.* RC586.



El module type

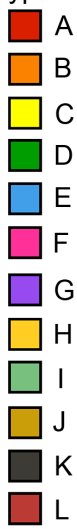

Identity [%]  
0 100

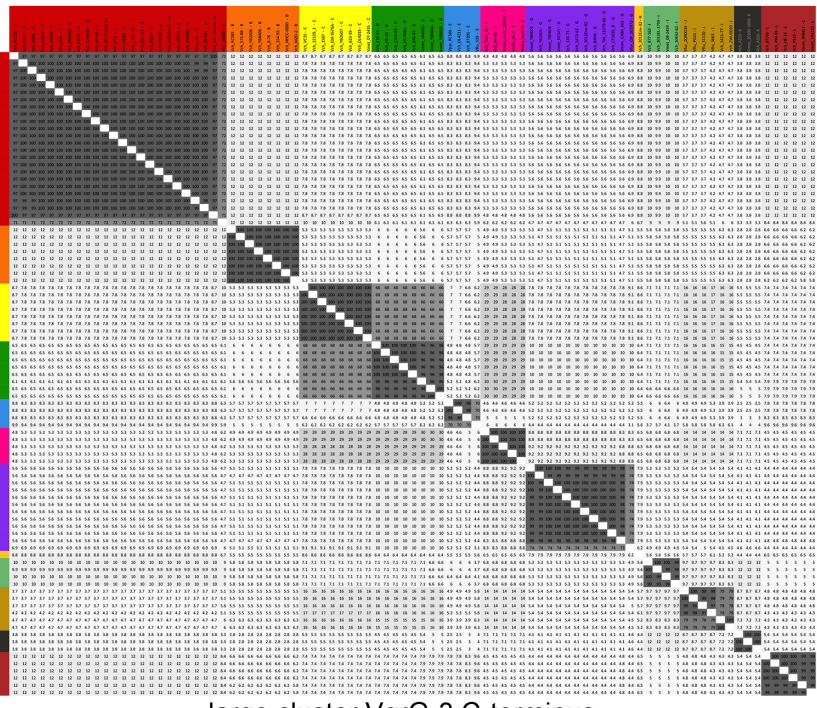

large cluster VgrG-3 C-terminus

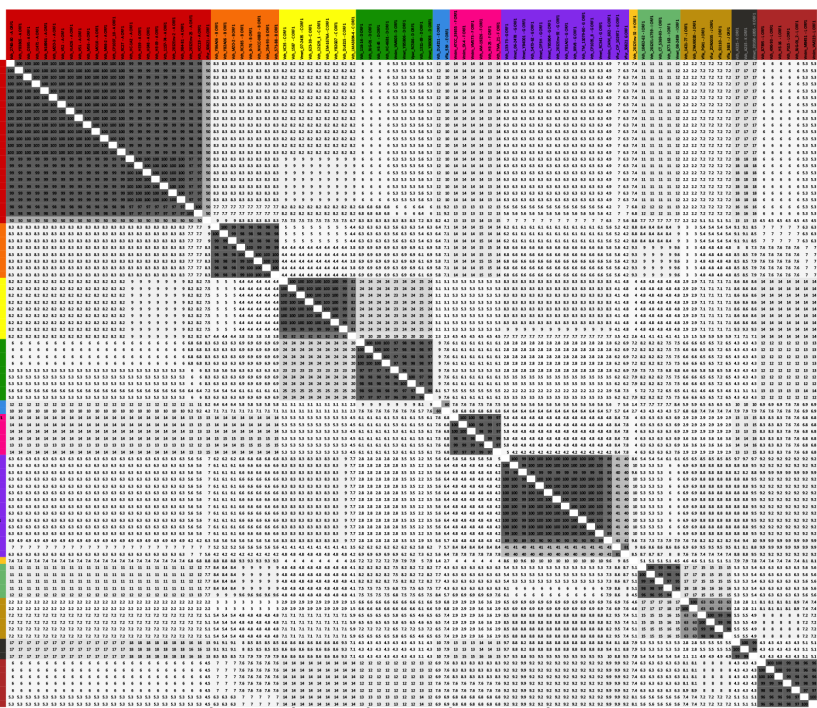

large cluster immunity protein

**Figure S3: Amino acid identity of variable region of VgrG-3 and cognate immunity gene.** Heat maps indicate percent identity of proteins found in investigated strains. Colouring of strain names indicates type of El module present

in the large cluster of the respective strain. Pseudogenes with interrupted reading frames were not included in the comparison. Vch = *Vibrio cholerae*, Vmet = *V. metoecus*, Vmim = *V. mimicus*, Vfur = *V. furnissii*, Vflu = *V. fluvialis*, Vpar = *V. sp.* RC586.

### Whole genome phylogeny

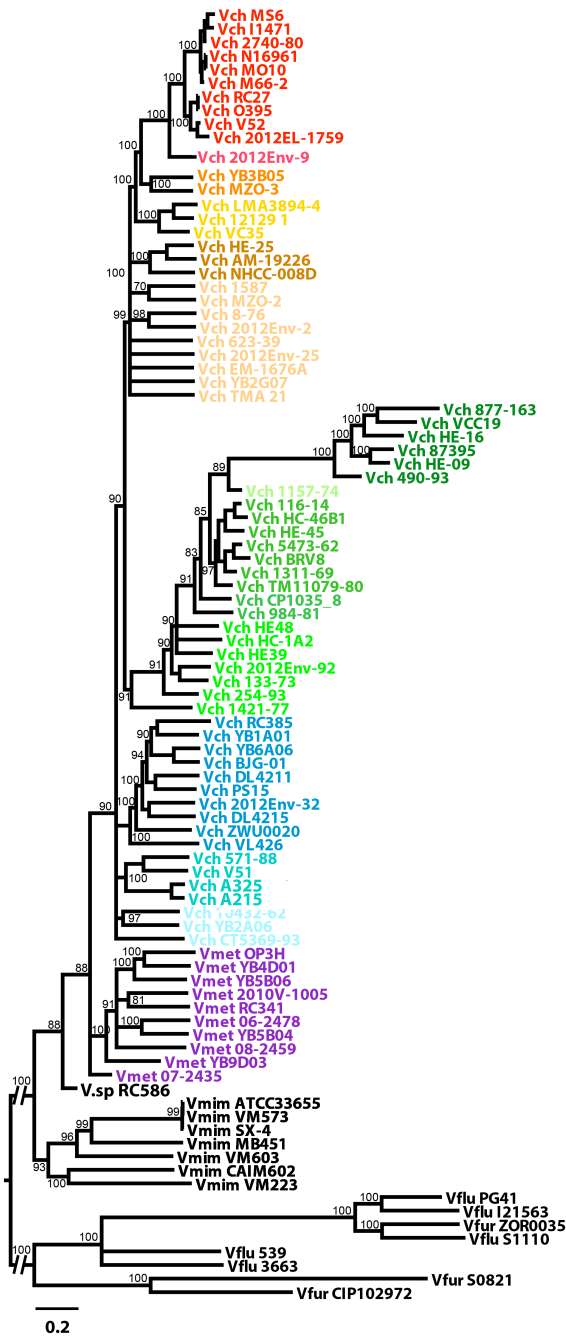

### aux-1 C-type effector

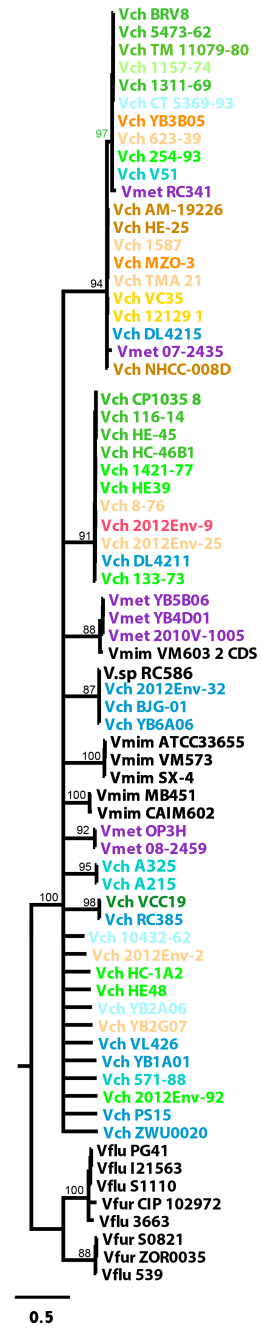

**Figure S4: Incongruence between whole genome phylogeny and single gene phylogeny of aux-1 C-type effector.** Whole genome tree corresponds to Figure 2. Related strains are colored similarly to ease comparison between tree topologies

but do not necessarily correspond to monophyletic groups. Aux-1 C-type effector phylogeny was calculated using the GTR+Gamma Maximum Likelihood model implemented in RAxML based a 2,315bp alignment. Black dots indicate orphan immunity genes (i.e. genes not directly downstream of an effector). Statistical branch support was obtained from 100 bootstrap repeats. Branches with support <70 were collapsed, as such every branch has a bootstrap support of >70. Scale bar indicates substitutions/site. Double dashes through branches indicates cut by length of 4.0 substitutions/site. Vch = *Vibrio cholerae*, Vmet = *V. metoecus*, Vmim = *V. mimicus*, Vfur = *V. furnissii*, Vflu = *V. fluvialis*.

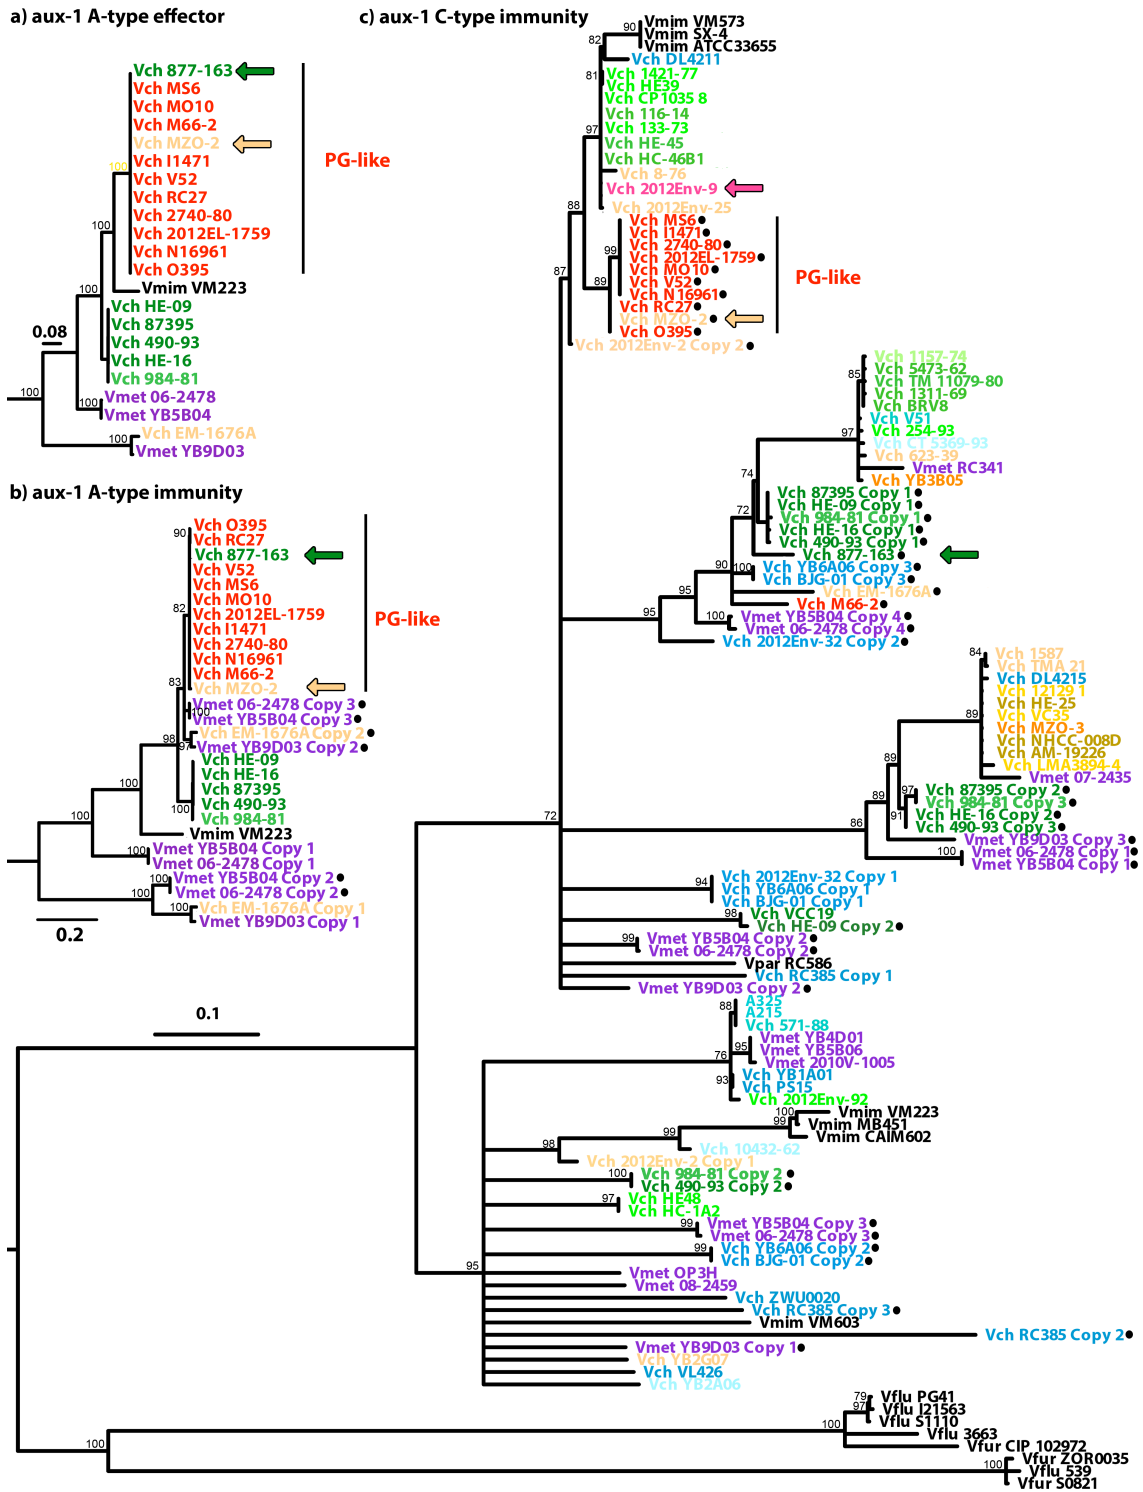

**Figure S5: Single gene phylogenies of aux-1 a) A-type effector, b) A-type immunity and c) C-type immunity genes.** Colouring of strains corresponds to whole genome tree of figure S4. Arrows indicate strains of interest discussed in text.

Phylogenetic trees were calculated using the GTR+Gamma Maximum Likelihood model implemented in RAxML based on single gene alignments (aux-1 A-type effector: 2,040bp; aux-1 A-type immunity: 754bp, aux-1 C-type immunity: 740bp. Black dots indicate orphan immunity genes (i.e. genes not directly downstream of an effector). Statistical branch support was obtained from 100 bootstrap repeats. Branches with support <70 were collapsed, as such every branch has a bootstrap support of >70. Scale bar indicates substitutions/site. Vch = *Vibrio cholerae*, Vmet = *V. metoecus*, Vmim = *V. mimicus*, Vfur = *V. furnissii*, Vflu = *V. fluvialis*.

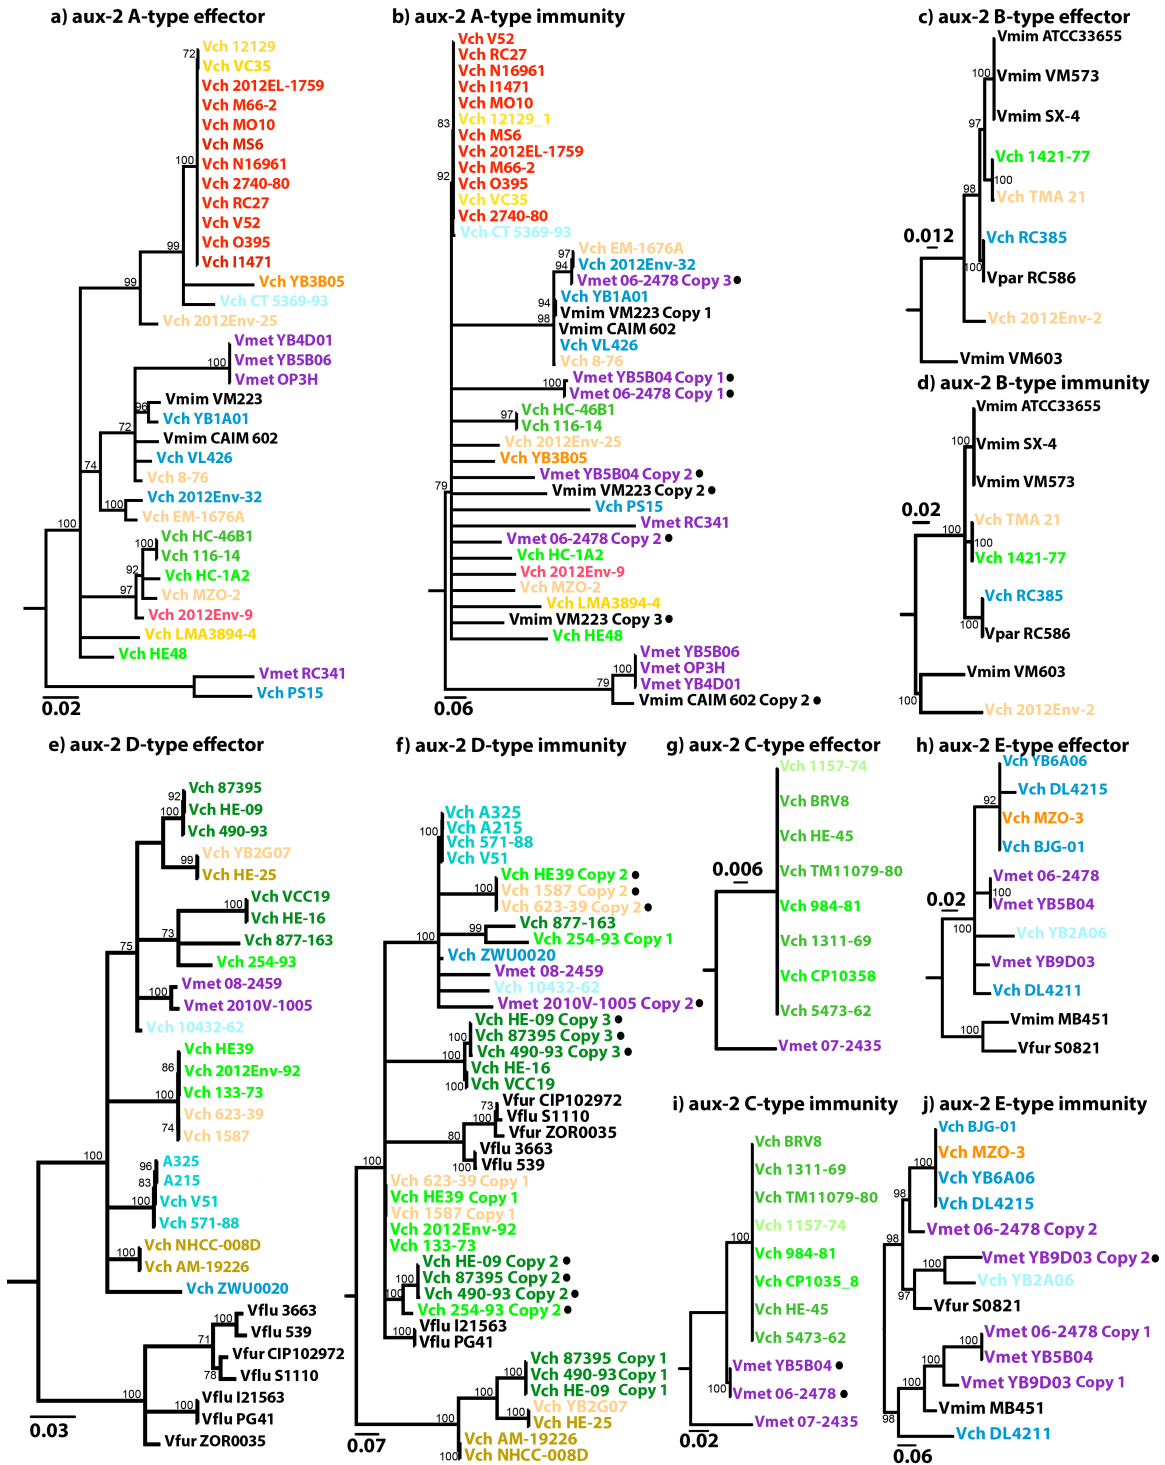

**Figure S6: Single gene phylogenies of aux-2 effector and immunity genes.** a) A-type effector b) A-type immunity c) B-type effector d) B-type immunity e) D-type effector f) D-type immunity g) C-type effector h) E-type effector i) C-type immunity j) E-type immunity



j) E-type immunity. Colouring of strains corresponds to whole genome tree of figure S4. Phylogenetic trees were calculated using the GTR+Gamma Maximum Likelihood model implemented in RAxML based on single gene alignments (aux-2 A-type effector: 3,268 bp; aux-2 B-type effector: 3,261 bp; aux-2 C-type effector: 3,531 bp; aux-2 D-type effector: 3,726 bp; aux-2 E-type effector: 3,594 bp; aux-2 A-type immunity: 741 bp; aux-2 B-type immunity: 1,119 bp; aux-2 C-type immunity: 951bp; aux-2 D-type immunity: 1,162 bp; aux-2 E-type immunity: 1,018 bp. Black dots indicate orphan immunity genes (i.e. genes not directly downstream of an effector). Statistical branch support was obtained from 100 bootstrap repeats. Branches with support <70 were collapsed, as such every branch has a bootstrap support of >70. Scale bar indicates substitutions/site. Vch = *Vibrio cholerae*, Vmet = *V. metoecus*, Vmim = *V. mimicus*, Vfur = *V. furnissii*, Vflu = *V. fluvialis*.

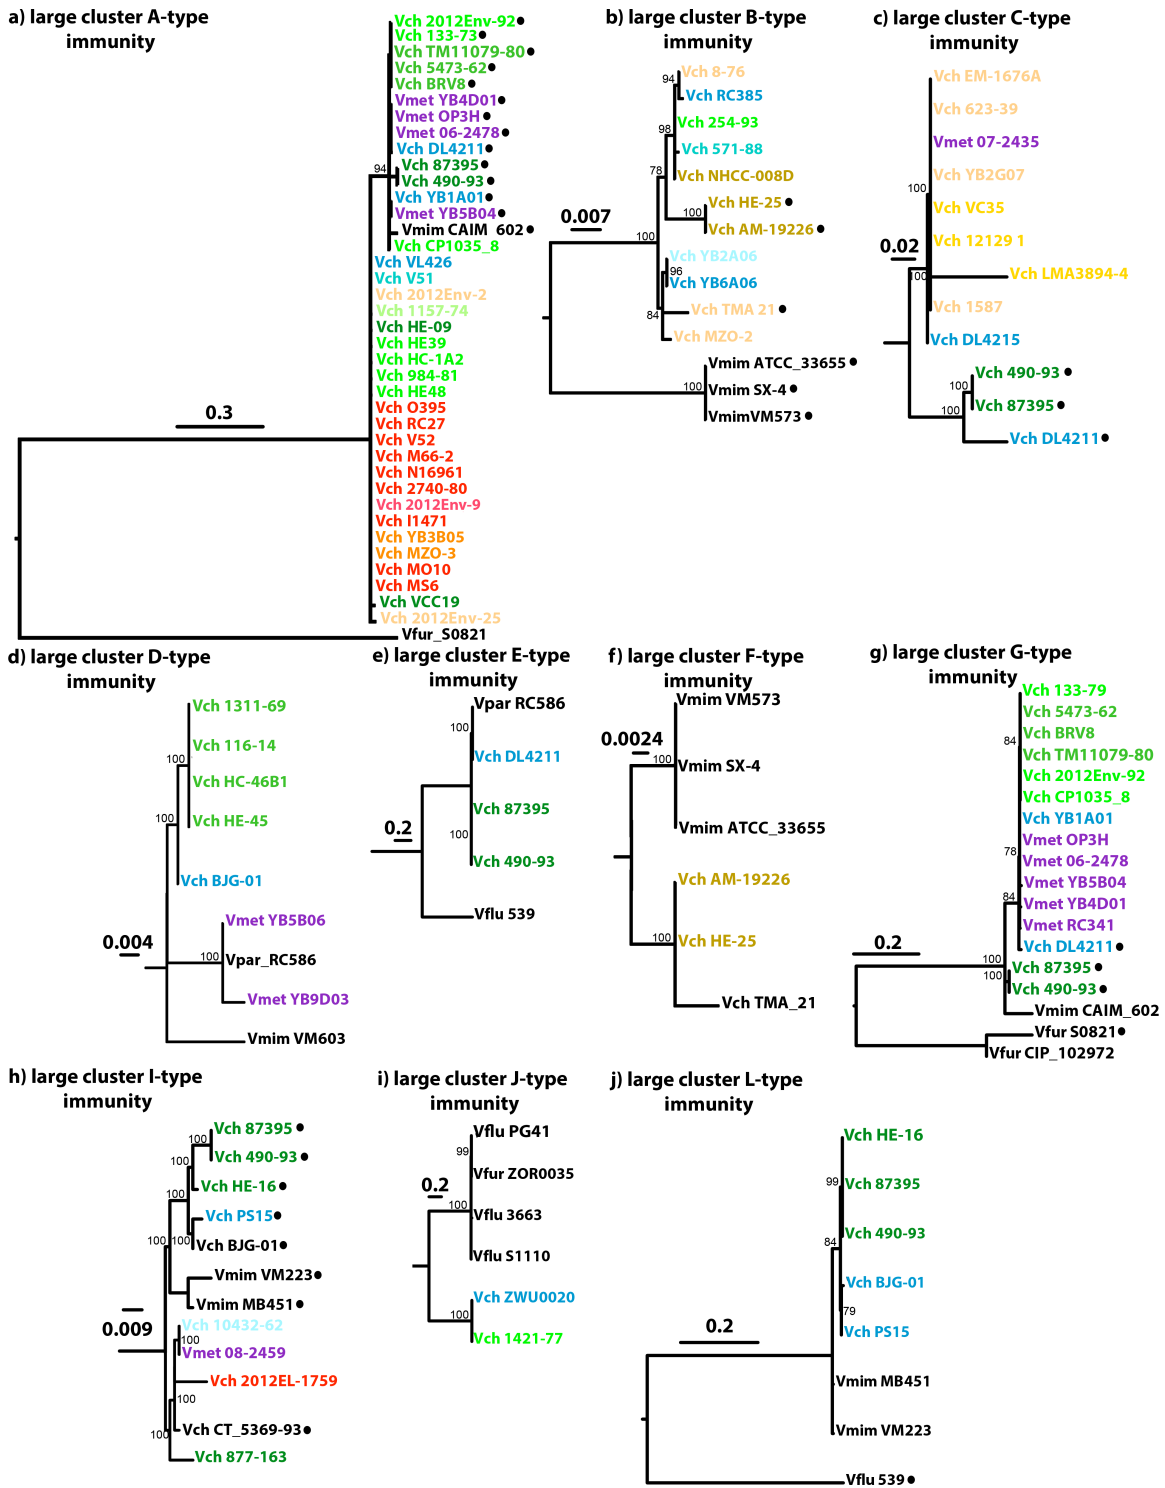

**Figure S7: Single gene phylogenies of large cluster immunity genes.** Colouring of strains corresponds to whole genome tree of figure S4. Phylogenetic trees were calculated using the GTR+Gamma Maximum Likelihood model implemented in

RAxML based on single gene alignments (main A-type immunity: 402 bp; main B-type immunity: 966 bp; main C-type immunity: 384bp; main D-type immunity: 399 bp; main E-type immunity: 346 bp; main F-type immunity: 409 bp; main G-type immunity: 585; main I-type immunity: 445 bp; main J-type immunity: 384 bp; main L-type immunity: 402 bp. Black dots indicate orphan immunity genes (i.e. genes not directly downstream of an effector). Statistical branch support was obtained from 100 bootstrap repeats. Branches with support <70 were collapsed, as such every branch has a bootstrap support of >70. Scale bar indicates substitutions/site. Vch = *Vibrio cholerae*, Vmet = *V. metoecus*, Vmim = *V. mimicus*, Vfur = *V. furnissii*, Vflu = *V. fluvialis*.

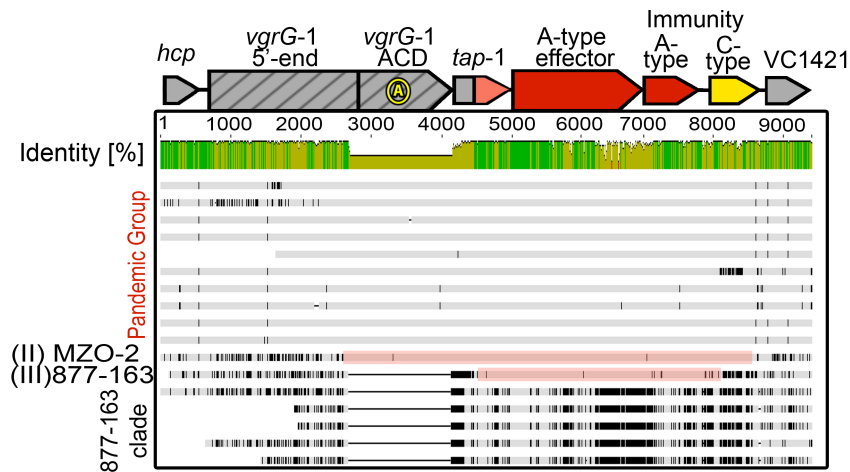

**Figure S8: Nucleotide alignment of *aux-1* clusters of the lineage containing pandemic *V. cholerae* and putative recombinant regions.** Grey regions indicated conserved sites while black lines indicate divergence from the consensus sequence. Red bars highlight regions in MZO-2 and 877-163 with high identity to the pandemic group *aux-1* cluster, indicating putative horizontal gene transfer.

**Supplementary Table 1: Accession numbers of genomes used in this study.**

| <b>Species</b>     | <b>Strain</b> | <b>Accession</b> | <b>Accession 2</b> |
|--------------------|---------------|------------------|--------------------|
| <i>V. cholerae</i> | MS6           | AP014524.1       | AP014525.1         |
| <i>V. cholerae</i> | I-1471        | CM003111.1       | CM003112.1         |
| <i>V. cholerae</i> | 2740-80       | AAUT00000000.1   |                    |
| <i>V. cholerae</i> | N16961        | AE003852.1       | AE003853.1         |
| <i>V. cholerae</i> | MO10          | AAKF00000000.3   |                    |
| <i>V. cholerae</i> | M66-2         | CP001233.1       | CP001234.1         |
| <i>V. cholerae</i> | RC27          | ADAI00000000.1   |                    |
| <i>V. cholerae</i> | O395          | CP001235.1       | CP001236.1         |
| <i>V. cholerae</i> | V52           | AAKJ00000000.2   |                    |
| <i>V. cholerae</i> | 2012EL-1759   | JNEW00000000.1   |                    |
| <i>V. cholerae</i> | 2012Env-9     | JSTH00000000.1   |                    |
| <i>V. cholerae</i> | CP1037(10)    | ALDB00000000.1   |                    |
| <i>V. cholerae</i> | YB3B05        | LBGB00000000.1   |                    |
| <i>V. cholerae</i> | MZO-3         | AAUU00000000.1   |                    |
| <i>V. cholerae</i> | LMA3984-4     | CP002555.1       | CP002556.1         |
| <i>V. cholerae</i> | 12129(1)      | ACFQ00000000.1   |                    |
| <i>V. cholerae</i> | VC35          | AMBR00000000.1   |                    |
| <i>V. cholerae</i> | HE-25         | ALEC00000000.1   |                    |
| <i>V. cholerae</i> | AM-19226      | AATY00000000.1   |                    |
| <i>V. cholerae</i> | NHCC-008D     | APGC00000000.1   |                    |
| <i>V. cholerae</i> | 1587          | AAUR00000000.1   |                    |
| <i>V. cholerae</i> | MZO-2         | AAWF00000000.1   |                    |
| <i>V. cholerae</i> | 8-76          | JIDN00000000.1   |                    |
| <i>V. cholerae</i> | 2012Env-2     | JSTD00000000.1   |                    |
| <i>V. cholerae</i> | 623-39        | AAWG00000000.1   |                    |
| <i>V. cholerae</i> | 2012Env-25    | JSTE00000000.1   |                    |
| <i>V. cholerae</i> | EM-1676A      | APFY00000000.1   |                    |
| <i>V. cholerae</i> | YB2G07        | LBGA00000000.1   |                    |
| <i>V. cholerae</i> | TMA21         | ACHY00000000.1   |                    |
| <i>V. cholerae</i> | 1421-77       | JMBL00000000.1   |                    |
| <i>V. cholerae</i> | 254-93        | JMBP00000000.1   |                    |
| <i>V. cholerae</i> | 133-73        | JIDK00000000.1   |                    |
| <i>V. cholerae</i> | 2012Env-92    | JSTJ00000000.1   |                    |
| <i>V. cholerae</i> | HE-39         | AFOQ00000000.1   |                    |
| <i>V. cholerae</i> | HC-1A2        | AJRO00000000.1   |                    |
| <i>V. cholerae</i> | HE-48         | AFOR00000000.1   |                    |
| <i>V. cholerae</i> | 984-81        | JMBM00000000.1   |                    |
| <i>V. cholerae</i> | CP1035(8)     | AJRM00000000.1   |                    |
| <i>V. cholerae</i> | TMM11079-80   | ACHW00000000.1   |                    |

|                    |            |                 |
|--------------------|------------|-----------------|
| <i>V. cholerae</i> | 1311-69    | JIDJ00000000.1  |
| <i>V. cholerae</i> | BRV8       | CTBD00000000.1  |
| <i>V. cholerae</i> | 5473-62    | JIDI00000000.1  |
| <i>V. cholerae</i> | HE-45      | ALED00000000.1  |
| <i>V. cholerae</i> | HC-46B1    | AJSL00000000.1  |
| <i>V. cholerae</i> | 116-14     | CGHE00000000.1  |
| <i>V. cholerae</i> | 1157-74    | JIDL00000000.1  |
| <i>V. cholerae</i> | 490-93     | JIDQ00000000.1  |
| <i>V. cholerae</i> | HE-09      | AFOP00000000.1  |
| <i>V. cholerae</i> | 87395      | APFL00000000.1  |
| <i>V. cholerae</i> | HE-16      | ALEB00000000.1  |
| <i>V. cholerae</i> | VCC19      | ATEV00000000.2  |
| <i>V. cholerae</i> | 877-163    | LBNV00000000.1  |
| <i>V. cholerae</i> | RC385      | AAKH00000000.3  |
| <i>V. cholerae</i> | YB1A01     | LBCL00000000.1  |
| <i>V. cholerae</i> | YB6A06     | LBGK00000000.1  |
| <i>V. cholerae</i> | BJGO1      | AFOU00000000.1  |
| <i>V. cholerae</i> | DL4211     | MOLL00000000.1  |
| <i>V. cholerae</i> | PS15       | AIJR00000000.1  |
| <i>V. cholerae</i> | 2012Env-32 | JSTF00000000.1  |
| <i>V. cholerae</i> | DL4215     | MOLM00000000.1  |
| <i>V. cholerae</i> | ZWU0020    | JRJX00000000.1  |
| <i>V. cholerae</i> | VL426      | ACHV00000000.1  |
| <i>V. cholerae</i> | 571-88     | JIDO00000000.1  |
| <i>V. cholerae</i> | V51        | AAKI00000000.2  |
| <i>V. cholerae</i> | A325       | CWSO00000000.1  |
| <i>V. cholerae</i> | A215       | CWSL00000000.1  |
| <i>V. cholerae</i> | 10432-62   | GCA_000969265.1 |
| <i>V. cholerae</i> | YB2A06     | LBFX00000000.1  |
| <i>V. cholerae</i> | CT5369-93  | ADAL00000000.1  |
| <i>V. metoecus</i> | OP3H       | JJMN00000000.1  |
| <i>V. metoecus</i> | YB4D01     | LBGO00000000.1  |
| <i>V. metoecus</i> | YB5B06     | LBGQ00000000.1  |
| <i>V. metoecus</i> | 2010V-1005 | LCUG00000000.1  |
| <i>V. metoecus</i> | RC341      | ACZT00000000.1  |
| <i>V. metoecus</i> | 06-2478    | LCUD00000000.1  |
| <i>V. metoecus</i> | YB5B04     | LBGP00000000.1  |
| <i>V. metoecus</i> | 08-2459    | LCUF00000000.1  |
| <i>V. metoecus</i> | YB9D03     | LBGR00000000.1  |
| <i>V. metoecus</i> | 07-2435    | LCUE00000000.1  |
| <i>V. mimicus</i>  | VM223      | ADAJ00000000.1  |
| <i>V. mimicus</i>  | CAIM602    | AOMO00000000.1  |
| <i>V. mimicus</i>  | VM603      | ACYU00000000.1  |

|                     |           |                |               |
|---------------------|-----------|----------------|---------------|
| <i>V. mimicus</i>   | MB451     | ADAF00000000.1 |               |
| <i>V. mimicus</i>   | SX-4      | ADOO00000000.1 |               |
| <i>V. mimicus</i>   | VM573-73  | ACYV00000000.1 |               |
| <i>V. mimicus</i>   | ATCC33655 | NZ_CP014042.1  | NZ_CP014043.1 |
| <i>V. furnissii</i> | CIP102972 | ACZP00000000.1 |               |
| <i>V. furnissii</i> | SO821     | LKHS00000000.1 |               |
| <i>V. fluvialis</i> | 3663      | JXXQ00000000.1 |               |
| <i>V. fluvialis</i> | 539       | JQHX00000000.1 |               |
| <i>V. fluvialis</i> | S1110     | LKHR00000000.1 |               |
| <i>V. furnissii</i> | ZOR0035   | JTLJ00000000.1 |               |
| <i>V. fluvialis</i> | I21563    | ASXT00000000.1 |               |
| <i>V. fluvialis</i> | PG41      | ASXS00000000.1 |               |

### Supplementary Table 2: Genomic locations of genomic cluster of interest

| Strain    | cluster | gene                                                         | Sequence ID    | start   | end     |
|-----------|---------|--------------------------------------------------------------|----------------|---------|---------|
| YB5B04    | aux-1   | A-type effector                                              | LBGP01000007.1 | 187794  | 189711  |
|           | aux-1   | A-type immunity gene 1                                       | LBGP01000007.1 | 187081  | 187797  |
|           | aux-1   | A-type immunity gene 2                                       | LBGP01000007.1 | 186365  | 187072  |
|           | aux-1   | A-type immunity gene 3                                       | LBGP01000007.1 | 185622  | 186254  |
|           | aux-1   | C-type immunity gene 1                                       | LBGP01000007.1 | 184744  | 185481  |
|           | aux-1   | C-type immunity gene 2                                       | LBGP01000007.1 | 183984  | 184769  |
|           | aux-1   | C-type immunity gene 3                                       | LBGP01000007.1 | 183227  | 184009  |
|           | aux-1   | C-type immunity gene 4<br>threonine efflux pump<br>(VCA1421) | LBGP01000007.1 | 182467  | 183252  |
|           | aux-1   | (VCA1421)                                                    | LBGP01000007.1 | 181741  | 182379  |
| 06-2478   | aux-1   | A-type effector                                              | LCUD01000037.1 | 2973    | 4887    |
|           | aux-1   | A-type immunity gene 1                                       | LCUD01000037.1 | 4884    | 5603    |
|           | aux-1   | A-type immunity gene 2                                       | LCUD01000037.1 | 5612    | 6238    |
|           | aux-1   | A-type immunity gene 3                                       | LCUD01000037.1 | 6431    | 7063    |
|           | aux-1   | C-type immunity gene 1                                       | LCUD01000037.1 | 7204    | 7941    |
|           | aux-1   | C-type immunity gene 2                                       | LCUD01000037.1 | 7916    | 8701    |
|           | aux-1   | C-type immunity gene 3                                       | LCUD01000037.1 | 8676    | 9458    |
|           | aux-1   | C-type immunity gene 4<br>threonine efflux pump<br>(VCA1421) | LCUD01000037.1 | 9433    | 10065   |
|           | aux-1   | (VCA1421)                                                    | LCUD01000037.1 | 10310   | 10948   |
| LMA3894-4 | aux-1   | vgrG-1                                                       | NC_017270.1    | 1411393 | 1412703 |
|           | aux-1   | vgrG-1/C-type immunity fusion                                | NC_017270.1    | 1412631 | 1414052 |
| YB5B04    | aux-2   | dehydrogenase                                                | LBGP01000034.1 | 3102    | 4103    |

|         |               |                                 |                |        |        |
|---------|---------------|---------------------------------|----------------|--------|--------|
|         | aux-2         | IS5 family transposase          | LBGP01000034.1 | 1559   | 2479   |
|         | aux-2         | aux-2 C-type immunity (partial) | LBGP01000034.1 | 902    | 1348   |
|         | aux-2         | aux-2 A-type immunity 1         | LBGP01000034.1 | 1      | 721    |
|         | aux-2         | aux-2 A-type immunity 2         | LBGP01000005.1 | 411    | 1133   |
|         | aux-2         | GST (VCA0022)                   | LBGP01000005.1 | 1242   | 1643   |
| 06-2478 | aux-2         | dehydrogenase                   | LCUD01000013.1 | 74065  | 75066  |
|         | aux-2         | IS5 family transposase          | LCUD01000013.1 | 72522  | 73442  |
|         | aux-2         | aux-2 C-type immunity (partial) | LCUD01000013.1 | 71865  | 72311  |
|         | aux-2         | aux-2 A-type immunity 1         | LCUD01000013.1 | 70785  | 71684  |
|         | aux-2         | aux-2 A-type immunity 2         | LCUD01000013.1 | 69764  | 70486  |
|         | aux-2         | aux-2 A-type immunity 3         | LCUD01000013.1 | 68731  | 69465  |
|         | aux-2         | GST (VCA0022)                   | LCUD01000013.1 | 68227  | 68628  |
| V52     | large cluster | vgrG-3 A-type                   | MIPN01000011.1 | 115720 | 118773 |
|         | large cluster | large cluster A-type immunity   | MIPN01000011.1 | 118770 | 119138 |
|         | large cluster | rbsD (VCA0125)                  | MIPN01000011.1 | 119779 | 120249 |
| S0821   | large cluster | vgrG-3 A-type                   | LKHS01000001.1 | 189108 | 192227 |
|         | large cluster | large cluster A-type immunity   | LKHS01000001.1 | 192224 | 192592 |
|         | large cluster | large cluster G-type immunity   | LKHS01000001.1 | 192600 | 193178 |
|         | large cluster | rbsD (VCA0125)                  | LKHS01000001.1 | 193953 | 194372 |
| MZO-2   | large cluster | vgrG-3 B-type (C-terminus)      | MIKJ01000102.1 | 118909 | 120225 |
|         | large cluster | large cluster B-type immunity   | MIKJ01000102.1 | 120246 | 121211 |
|         | large cluster | rbsD (VCA0125)                  | MIKJ01000102.1 | 121752 | 122222 |
| DL4215  | large cluster | vgrG-3 C-type                   | KF228946.1     | 29404  | 32517  |
|         | large cluster | large cluster C-type immunity   | KF228946.1     | 32504  | 32887  |
|         | large cluster | rbsD (VCA0125)                  | KF228946.1     | 33758  | 34228  |
| HE-45   | large cluster | vgrG-3 D-type                   | ALED01000027.1 | 175382 | 178705 |
|         | large cluster | large cluster D-type immunity   | ALED01000027.1 | 175002 | 175400 |
|         | large cluster | large cluster D-type ORF2       | ALED01000027.1 | 174526 | 174972 |
|         | large cluster | rbsD (VCA0125)                  | ALED01000027.1 | 173520 | 173990 |



|            |               |                               |                |        |        |
|------------|---------------|-------------------------------|----------------|--------|--------|
| DL4211     | large cluster | vgrG-3 E-type                 | KF228945.1     | 24923  | 27853  |
|            | large cluster | large cluster E-type immunity | KF228945.1     | 27847  | 28167  |
|            | large cluster | large cluster C-type immunity | KF228945.1     | 28225  | 28608  |
|            | large cluster | large cluster G-type immunity | KF228945.1     | 28825  | 29406  |
|            | large cluster | large cluster A-type immunity | KF228945.1     | 29372  | 29767  |
|            | large cluster | rbsD (VCA0125)                | KF228945.1     | 30408  | 30878  |
| RC586      | large cluster | vgrG-3 E-type                 | ADBD01000008.1 | 513368 | 516298 |
|            | large cluster | large cluster E-type immunity | ADBD01000008.1 | 516292 | 516612 |
|            | large cluster | vgrG-3 D-type (partial)       | ADBD01000008.1 | 516590 | 517276 |
|            | large cluster | large cluster D-type immunity | ADBD01000008.1 | 517258 | 517656 |
|            | large cluster | large cluster D-type ORF2     | ADBD01000008.1 | 517686 | 518132 |
|            | large cluster | rbsD (VCA0125)                | ADBD01000008.1 | 518666 | 519136 |
|            | large cluster |                               |                |        |        |
| 539        | large cluster | vgrG-3 E-type                 | JQHX01000001.1 | 182203 | 185001 |
|            | large cluster | large cluster E-type immunity | JQHX01000001.1 | 181892 | 182209 |
|            | large cluster | large cluster L-type immunity | JQHX01000001.1 | 181294 | 181692 |
|            | large cluster | rbsD (VCA0125)                | JQHX01000001.1 | 180043 | 180600 |
|            | large cluster |                               |                |        |        |
| TMA 21     | large cluster | vgrG-3 F-type                 | ACHY01000016.1 | 609284 | 612562 |
|            | large cluster | large cluster F-type immunity | ACHY01000016.1 | 612562 | 612969 |
|            | large cluster | large cluster B-type immunity | ACHY01000016.1 | 612997 | 613962 |
|            | large cluster | rbsD (VCA0125)                | ACHY01000016.1 | 614503 | 614973 |
|            | large cluster |                               |                |        |        |
| TM11079-80 | large cluster | vgrG-3 G-type                 | ACHW01000028.1 | 35703  | 39056  |
|            | large cluster | large cluster G-type immunity | ACHW01000028.1 | 39061  | 39642  |
|            | large cluster | large cluster A-type immunity | ACHW01000028.1 | 39608  | 40003  |
|            | large cluster | rbsD (VCA0125)                | ACHW01000028.1 | 40644  | 41114  |
|            | large cluster |                               |                |        |        |
| 2012Env-32 | large cluster | vgrG-3 H-type (partial)       | JSTF01000013.1 | 76141  | 78329  |
|            | large cluster | large cluster H-type immunity | JSTF01000013.1 | 75555  | 76139  |

|             |               |                               |                |        |        |
|-------------|---------------|-------------------------------|----------------|--------|--------|
|             | large cluster | rbsD (VCA0125)                | JSTF01000013.1 | 74539  | 75009  |
| 2012EL-1759 | large cluster | vgrG-3 I-type                 | JNEW01000035.1 | 475249 | 478314 |
|             | large cluster | large cluster I-type immunity | JNEW01000035.1 | 478301 | 478744 |
|             | large cluster | rbsD (VCA0125)                | JNEW01000035.1 | 479308 | 479778 |
|             |               |                               |                |        |        |
| ZWU0020     | large cluster | vgrG-3 J-type                 | JRJX01000133.1 | 80843  | 83827  |
|             | large cluster | large cluster J-type immunity | JRJX01000133.1 | 83836  | 84207  |
|             | large cluster | large cluster H-type immunity | JRJX01000133.1 | 84378  | 84683  |
|             | large cluster | rbsD (VCA0125)                | JRJX01000133.1 | 85229  | 85699  |
|             |               |                               |                |        |        |
| PG41        | large cluster | vgrG-3 J-type                 | ASXS01000008.1 | 176240 | 179278 |
|             | large cluster | large cluster J-type immunity | ASXS01000008.1 | 179275 | 179658 |
|             | large cluster | rbsD (VCA0125)                | ASXS01000008.1 | 180443 | 180862 |
| A325        | large cluster | vgrG-3 K-type                 | CWSO01000002.1 | 410073 | 413039 |
|             | large cluster | large cluster K-type immunity | CWSO01000002.1 | 413017 | 413454 |
|             | large cluster | large cluster K-type ORF2     | CWSO01000002.1 | 413460 | 413891 |
|             | large cluster | rbsD (VCA0125)                | CWSO01000002.1 | 414493 | 414963 |
|             |               |                               |                |        |        |
| PS15        | large cluster | vgrG-3 L-type                 | AIJR01000051.1 | 84155  | 87223  |
|             | large cluster | large cluster L-type immunity | AIJR01000051.1 | 87220  | 87624  |
|             | large cluster | large cluster I-type immunity | AIJR01000051.1 | 87649  | 88149  |
|             | large cluster | rbsD (VCA0125)                | AIJR01000051.1 | 88713  | 89183  |
| 490-93      | large cluster | vgrG-3 L-type                 | JIDQ01000041.1 | 5600   | 8575   |
|             | large cluster | large cluster L-type immunity | JIDQ01000041.1 | 8572   | 8976   |
|             | large cluster | large cluster I-type immunity | JIDQ01000041.1 | 9001   | 9501   |
|             | large cluster | vgrG-3 E-type (partial)       | JIDQ01000041.1 | 9856   | 10855  |
|             | large cluster | large cluster E-type immunity | JIDQ01000041.1 | 10822  | 11169  |
|             | large cluster | large cluster C-type immunity | JIDQ01000041.1 | 11227  | 11610  |
|             | large cluster | large cluster G-type immunity | JIDQ01000041.1 | 11831  | 12412  |
|             | large cluster | large cluster A-type immunity | JIDQ01000041.1 | 12378  | 12773  |

cluster

large

cluster

rbsD (VCA0125)

JIDQ0100041.1

13388

13858

---
